# Supplementary material
Source: PubMed Central journal article supplement (PMC8527840)
Supplement: mmc1.pdf [file mmc1.pdf]

# COVID-19 Vaccine Perspectives

Please complete the survey below.

Thank you!

## COVID-19 VACCINE PERSPECTIVES

**Thank you for taking the time to complete this brief survey on your thoughts on the COVID-19 vaccine. We are collecting this information to better understand the reasons why you may or may not feel comfortable receiving the COVID-19 vaccine. All of your responses will be kept confidential, and will not impact the outcome of whether you choose to get vaccinated or not.**

**In relation to vaccines, including the COVID-19 vaccine, please answer to what degree you agree or disagree to the following statements:**

|                                                                                                | Strongly Disagree     | Somewhat Disagree     | Neutral               | Somewhat Agree        | Strongly Agree        |
|------------------------------------------------------------------------------------------------|-----------------------|-----------------------|-----------------------|-----------------------|-----------------------|
| Vaccines are important for my health.                                                          | <input type="radio"/> |
| Vaccines are a good way to protect myself from disease.                                        | <input type="radio"/> |
| Overall, vaccines are safe.                                                                    | <input type="radio"/> |
| I am afraid of injections.                                                                     | <input type="radio"/> |
| I believe in natural or traditional cures instead of vaccines and medical treatment.           | <input type="radio"/> |
| I am against vaccination in general.                                                           | <input type="radio"/> |
| I have religious reasons for not getting vaccines.                                             | <input type="radio"/> |
| The history of racial/ethnic abuse in science research influences my view on vaccines.         | <input type="radio"/> |
| I trust vaccines to be well researched and do no harm.                                         | <input type="radio"/> |
| Getting vaccinated is important for the health of others in my community.                      | <input type="radio"/> |
| I trust information I get about vaccines from public health leaders or my healthcare provider. | <input type="radio"/> |
| I am concerned about serious adverse effects of vaccines.                                      | <input type="radio"/> |

|                                                                                                                 | Strongly Disagree     | Somewhat Disagree     | Neutral               | Somewhat Agree        | Strongly Agree        |
|-----------------------------------------------------------------------------------------------------------------|-----------------------|-----------------------|-----------------------|-----------------------|-----------------------|
| New vaccines carry more risk than older vaccines.                                                               | <input type="radio"/> |
| Mostly, I do what my doctor or health care provider recommends about vaccines for myself and my family.         | <input type="radio"/> |
| People of my racial/ethnic group cannot trust doctors and healthcare workers.                                   | <input type="radio"/> |
| Doctors have the best interests of people of my racial/ethnic group in mind.                                    | <input type="radio"/> |
| I have personally been treated badly or unfairly by doctors or healthcare workers because of my race/ethnicity. | <input type="radio"/> |
| A coronavirus (COVID-19) vaccine will protect me from COVID-19 disease.                                         | <input type="radio"/> |
| I trust the scientific research process for creating new COVID-19 vaccines.                                     | <input type="radio"/> |
| I think the COVID-19 vaccine may not be safe.                                                                   | <input type="radio"/> |
| People of my racial/ethnic group should not trust the new COVID-19 vaccine.                                     | <input type="radio"/> |
| I feel like the COVID-19 vaccine is being tested on me.                                                         | <input type="radio"/> |
| For males or females: I am worried the COVID-19 vaccine might impact my fertility/ability to have children.     | <input type="radio"/> |
| I would like to see more long-term success of the effect of the COVID-19 vaccine before I get it myself.        | <input type="radio"/> |

When the coronavirus (COVID-19) vaccine becomes available: (please select one answer)

- I have already received the COVID-19 vaccine
- I intend to get it as soon as possible
- I intend to wait and see how it affects others before I get it
- I do not intend on getting it soon, but might sometime in the future
- I do not intend to ever get the vaccine

Please explain your decision to get the vaccine as soon as possible (select all that apply)

- I want to protect my family  
 I want to protect my community  
 I want to protect myself  
 I have a chronic health condition  
 My doctor recommends vaccines  
 Other

Please specify \_\_\_\_\_

If you plan to delay or not receive a COVID-19 vaccine, what are some reasons? (select all that apply)

- I am sure there will be other effective treatments soon  
 I do not yet know enough about the vaccine to make a decision  
 I want to gain natural immunity to the virus that causes COVID-19  
 Development of the vaccine may be rushed and the vaccine may not be thoroughly tested  
 I think COVID-19 vaccine may not be safe  
 I believe vaccines may give you the disease they are designed to protect against  
 I cannot be bothered to get vaccine  
 Concern about side effects/ bad reaction  
 Fear of needles  
 Getting the vaccine will be inconvenient  
 I don't think that COVID-19 is dangerous to my health  
 I think the COVID-19 vaccine is intended to make me sick  
 Other

Please specify \_\_\_\_\_

As far as you know, would your employer want you to have the coronavirus vaccination?

- Yes  
 No  
 Don't know

|                                                                                                      | Very likely           | Moderately likely     | Neither likely or unlikely | Moderately unlikely   | Very unlikely         |
|------------------------------------------------------------------------------------------------------|-----------------------|-----------------------|----------------------------|-----------------------|-----------------------|
| If a COVID vaccine becomes required by your employer, rate how likely you are willing to receive it. | <input type="radio"/> | <input type="radio"/> | <input type="radio"/>      | <input type="radio"/> | <input type="radio"/> |

Did you completely answer all the questions on this page that you intended to?

- Yes  
 No
